# Supplementary material for: SOX7 regulates the expression of VE-cadherin in the haemogenic endothelium at the onset of haematopoietic development
Source: Oxford University Press journal article supplement (doi:10.1242/dev.071282), 2012-04-03
Supplement: dev071282figs8.pdf [file dev071282figs8.pdf]

**A**

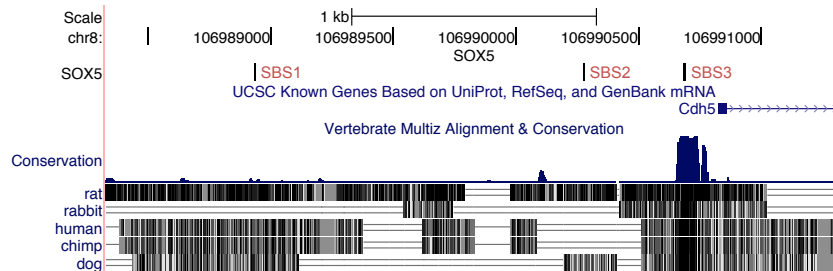

**B**

| Conservation |   |   |   |   |   |   |   |   |   |   |   |   |   |   |   |   |   |   |      |
|--------------|---|---|---|---|---|---|---|---|---|---|---|---|---|---|---|---|---|---|------|
| Gaps         |   |   |   |   |   |   |   |   |   |   |   |   |   |   |   |   |   |   |      |
| mouse        | G | A | T | G | A | C | A | A | C | A | A | T | G | A | C | T | G | T | SBS1 |
| rat          | G | A | C | A | A | C | A | A | C | G | A | T | G | G | C | T | G | T |      |
| rabbit       | = | = | = | = | = | = | = | = | = | = | = | = | = | = | = | = | = | = |      |
| human        | G | A | C | C | A | C | A | G | G | A | A | C | A | G | T | C | G | T |      |
| chimp        | G | A | C | C | A | C | A | G | G | A | A | C | A | G | T | C | G | T |      |
| dog          | G | A | C | G | A | C | A | G | G | A | A | C | A | G | C | A | G | G |      |
| Conservation |   |   |   |   |   |   |   |   |   |   |   |   |   |   |   |   |   |   |      |
| Gaps         |   |   |   |   |   |   |   |   |   |   |   |   |   |   |   |   |   |   |      |
| mouse        | A | A | A | G | T | G | A | T | T | G | T | C | T | G | T | C | A | C | SBS2 |
| rat          | G | A | A | G | T | G | A | C | T | G | T | C | T | G | T | C | C | C |      |
| rabbit       | = | = | = | = | = | = | = | = | = | = | = | = | = | = | = | = | = | = |      |
| human        | = | = | = | = | = | = | = | = | = | = | = | = | = | = | = | = | = | = |      |
| chimp        | = | = | = | = | = | = | = | = | = | = | = | = | = | = | = | = | = | = |      |
| dog          | A | G | A | G | C | T | G | - | - | - | - | G | T | T | T | C | C | C |      |
| Conservation |   |   |   |   |   |   |   |   |   |   |   |   |   |   |   |   |   |   |      |
| Gaps         |   |   |   |   |   |   |   |   |   |   |   |   |   |   |   |   |   |   |      |
| mouse        | C | A | A | A | G | G | A | A | C | A | A | T | A | A | C | A | G | G | SBS3 |
| rat          | C | A | A | A | G | G | A | A | C | A | A | T | A | A | C | A | G | G |      |
| rabbit       | C | A | A | A | G | G | A | A | C | A | A | T | A | A | C | A | G | G |      |
| human        | C | A | A | A | G | G | A | A | C | A | A | T | A | A | C | A | G | G |      |
| chimp        | C | A | A | A | G | G | A | A | C | A | A | T | A | A | C | A | G | G |      |
| dog          | C | A | A | A | G | G | A | A | C | A | A | T | A | A | C | A | G | G |      |
