# Supplementary material for: SOX7 regulates the expression of VE-cadherin in the haemogenic endothelium at the onset of haematopoietic development
Source: Oxford University Press journal article supplement (doi:10.1242/dev.071282), 2012-04-03
Supplement: dev071282tables1.pdf [file dev071282tables1.pdf]

**Table S1. Primers**

| Primer                                        | Sequence                       | Application (EUP No.) |
|-----------------------------------------------|--------------------------------|-----------------------|
| $\beta$ -Actin – For.                         | TGACAGGATGCAGAAGGAGA           | Gene expression (106) |
| $\beta$ -Actin – Rev.                         | CGCTCAGGAGGAGCAATG             | Gene expression (106) |
| <i>Gapdh</i> promoter – For.                  | TAGGAGACACTGCCCTTTC            | ChIP (45)             |
| <i>Gapdh</i> promoter – Rev.                  | CCCTCACGTCCCAACTCTC            | ChIP (45)             |
| <i>Pu.1</i> – For.                            | GGAGAAGCTGATGGCTTGG            | Gene expression (94)  |
| <i>Pu.1</i> – Rev.                            | CAGGCGAATCTTTTCTTGC            | Gene expression (94)  |
| <i>Sox7</i> – For.                            | CAGCAAGATGCTGGGAAAG            | Gene expression (97)  |
| <i>Sox7</i> – Rev.                            | TGCATCATCCACATAGGGTCT          | Gene expression (97)  |
| <i>VE-cadherin</i> – For.                     | TCATCAAACCCACGAAGTCC           | Gene expression (42)  |
| <i>VE-cadherin</i> – Rev.                     | GGTCTGTGGCCTCAATGTAGA          | Gene expression (42)  |
| <i>VE-cadherin</i> promoter – For.            | CACCGTAGGGCTTGCCTAT            | ChIP (27)             |
| <i>VE-cadherin</i> promoter – Rev.            | TCGGGATGGTTTCTGTTAT            | ChIP (27)             |
| <i>VE-cadherin</i> SBS3M promoter – For.      | AGCTCACAAAGGAAgccgAACAGGAAACCA | Directed mutagenesis  |
| <i>VE-cadherin</i> SBS3M promoter – Rev.      | TGGTTTCCTGTTcggcTTCCTTTGTGAGCT | Directed mutagenesis  |
| <i>VE-cadherin</i> MluI-3,039 promoter – For. | GAGAACGTGCGAGGGGAAGGAGGAGAAAGA | PCR amplification     |
| <i>VE-cadherin</i> MluI-1,104 promoter – For. | GAGAACGCGTCACTCTGGGGTCTGTCATT  | PCR amplification     |
| <i>VE-cadherin</i> MluI-531 promoter – For.   | GAGAACGCGTCCCGACTCTGAGAACTCCAC | PCR amplification     |
| <i>VE-cadherin</i> XhoI+23 promoter – Rev.    | GAGACTCGAGCAGAAGGCTCTCTCCACTGC | PCR amplification     |
| <i>VE-cadherin</i> CDS BamHI – For.           | GGATCCAAGATCAGCTCCTCCACGAA     | PCR amplification     |
| <i>VE-cadherin</i> CDS XhoI – Rev.            | CTCGAGGATGATGAGTTCCTCCTGGGG    | PCR amplification     |

Lowercase indicates nucleotide substitutions.

EUP, Exiqon universal probe; For., forward; Rev., reverse.
