# Supplementary material for: SOX7 regulates the expression of VE-cadherin in the haemogenic endothelium at the onset of haematopoietic development
Source: Oxford University Press journal article supplement (doi:10.1242/dev.071282), 2012-04-03
Supplement: dev071282tables2.pdf [file dev071282tables2.pdf]

**Table S2. The promoter of *VE-cadherin* contains three SBSs**

| Name | Score  | Start | End   | Strand | Predicted site sequence |
|------|--------|-------|-------|--------|-------------------------|
| SBS1 | 10.075 | -1895 | -1890 | +      | AACAAT                  |
| SBS2 | 7.562  | -554  | -549  | -      | ATTGTC                  |
| SBS3 | 9.767  | -141  | -136  | +      | AACAAT                  |

Motif search analysis of SOX5 sites in the mouse *VE-cadherin* 2500 bp promoter using JASPAR database reveals the presence of three SBSs; the position of the predicted site sequence relative to the TSS is shown.
