# Supplementary figures and images for: SOX7 regulates the expression of VE-cadherin in the haemogenic endothelium at the onset of haematopoietic development
Source: Oxford University Press journal article supplement (doi:10.1242/dev.071282), 2012-04-03

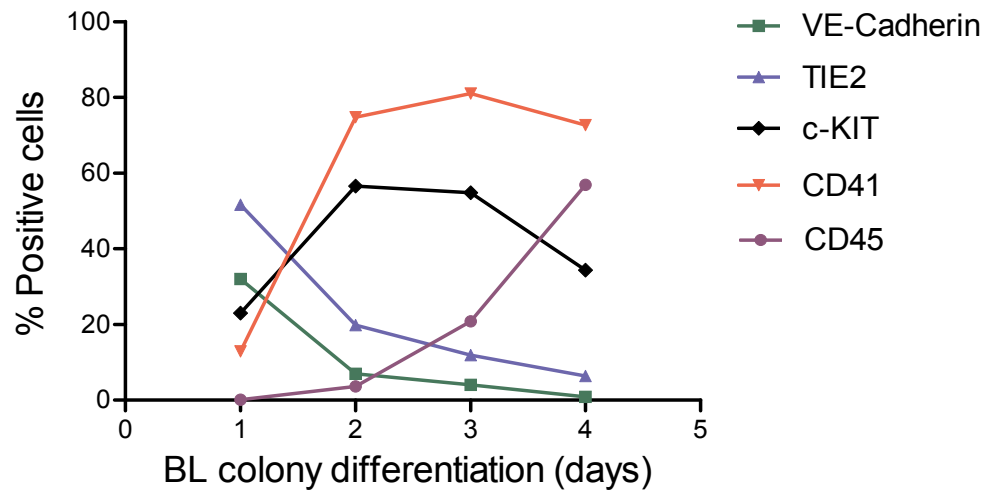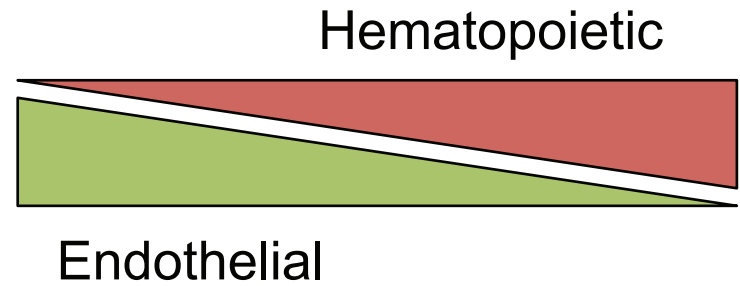

Supplement: dev071282figs1.pdf [file dev071282figs1.pdf]

**A**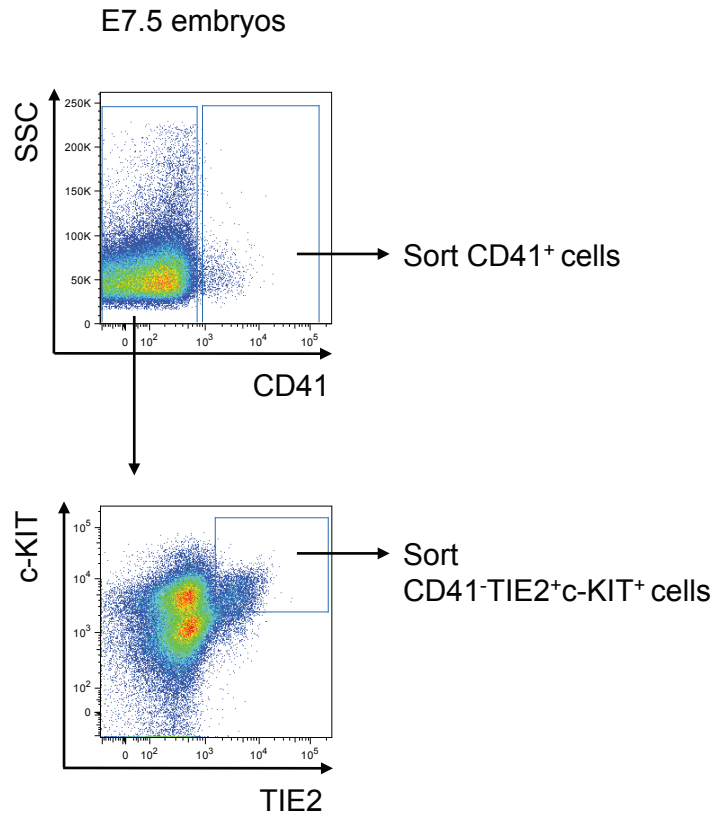**B**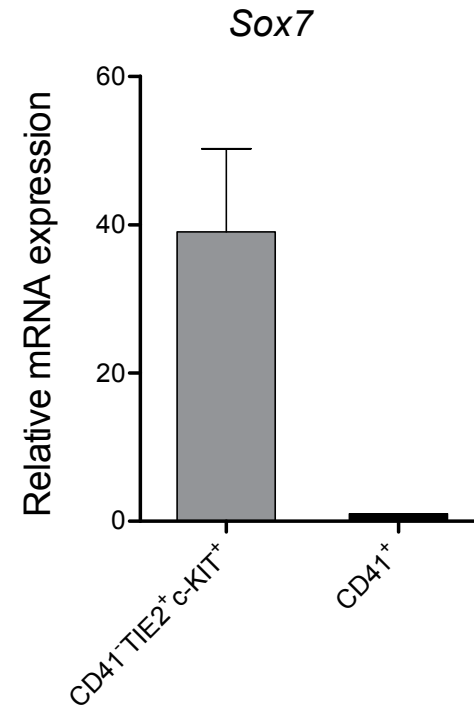

Supplement: dev071282figs2.pdf [file dev071282figs2.pdf]

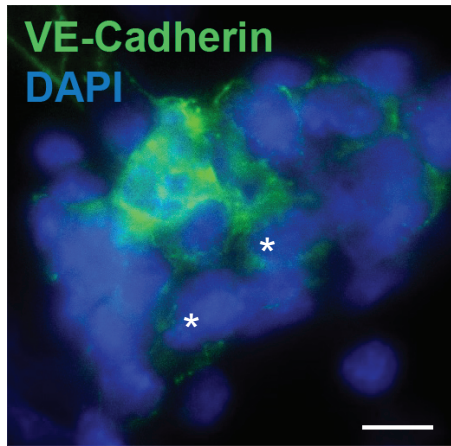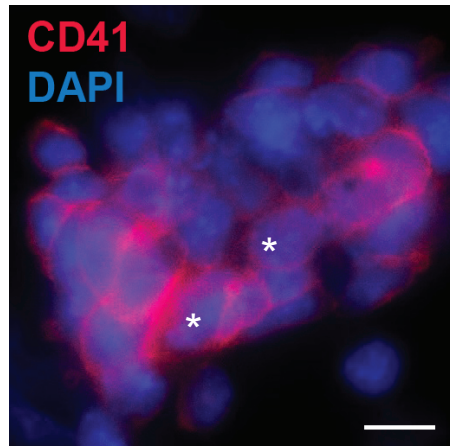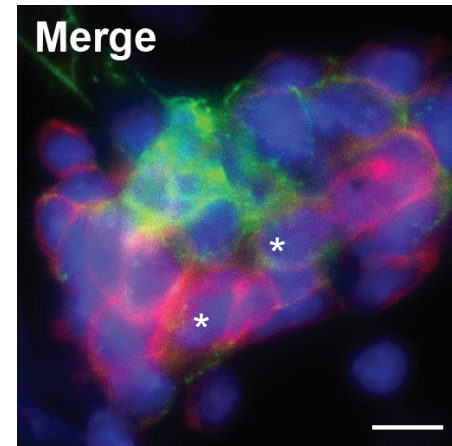

Supplement: dev071282figs3.pdf [file dev071282figs3.pdf]

**A**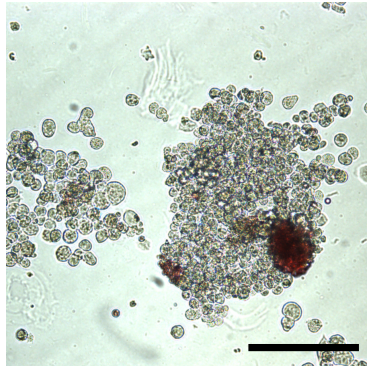

Day 1

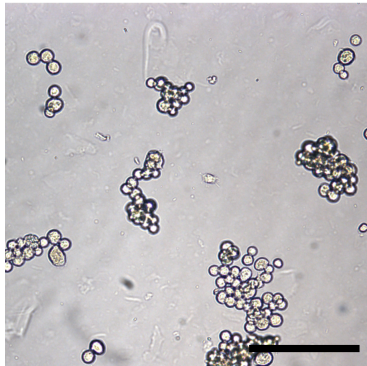

Day 4

**B**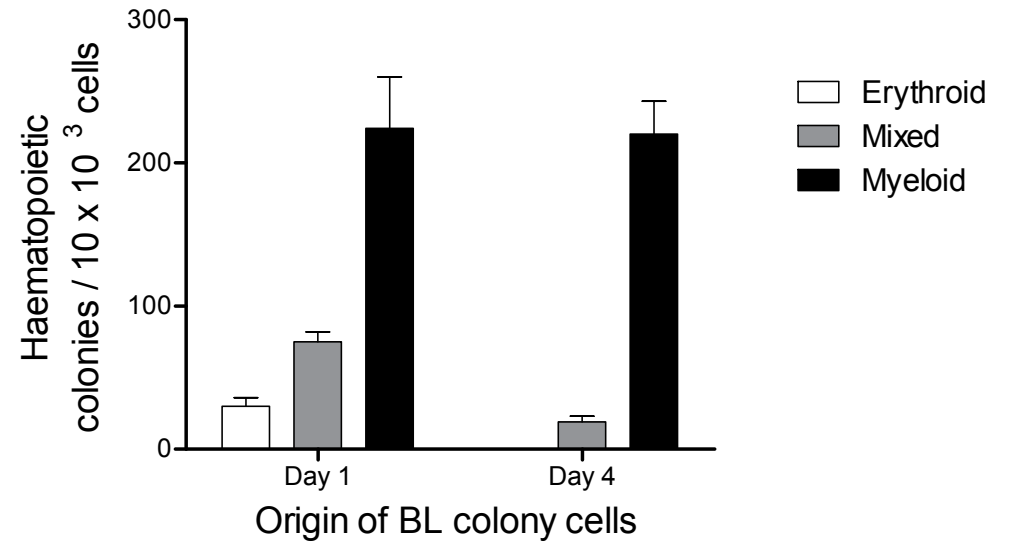

Supplement: dev071282figs4.pdf [file dev071282figs4.pdf]

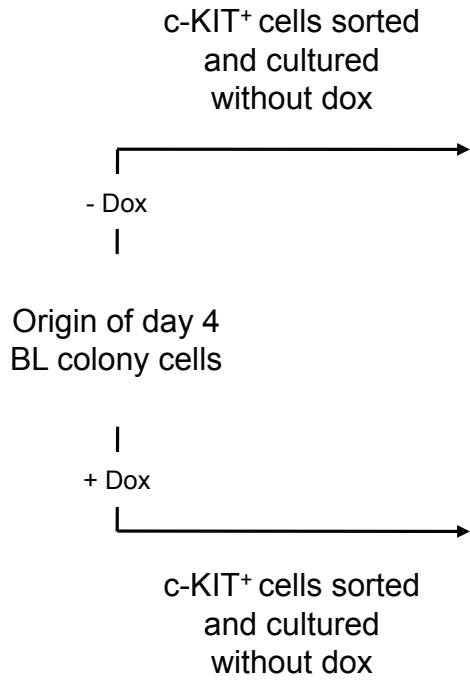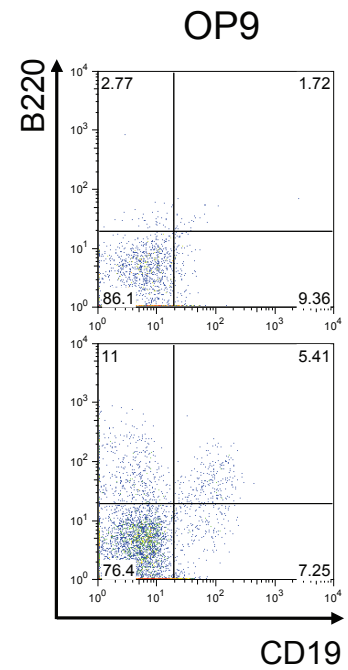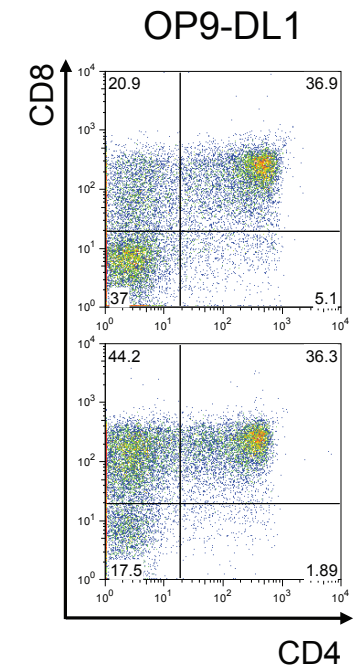

Supplement: dev071282figs5.pdf [file dev071282figs5.pdf]

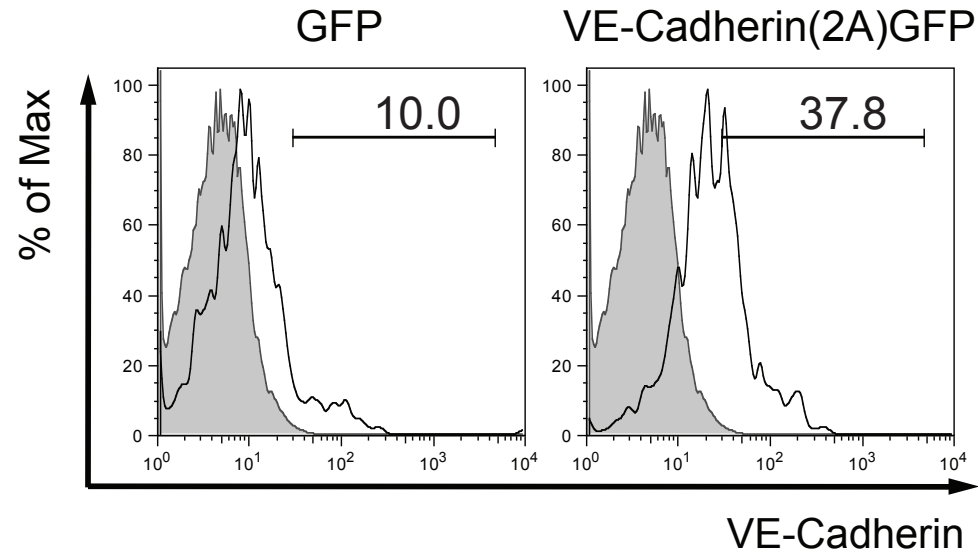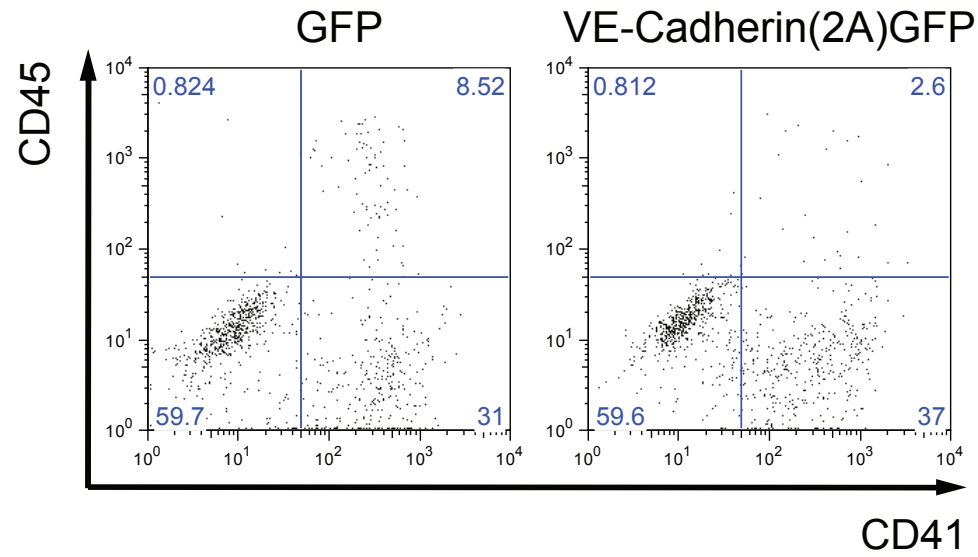

Supplement: dev071282figs6.pdf [file dev071282figs6.pdf]

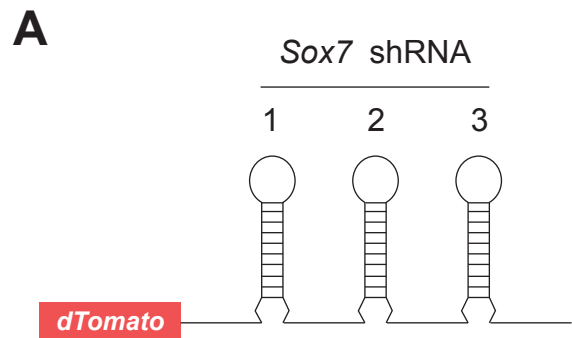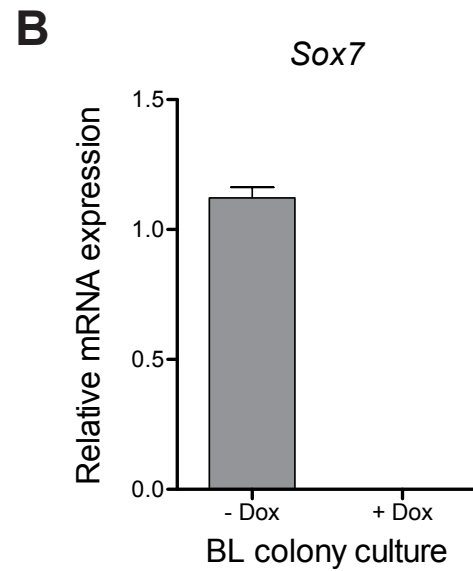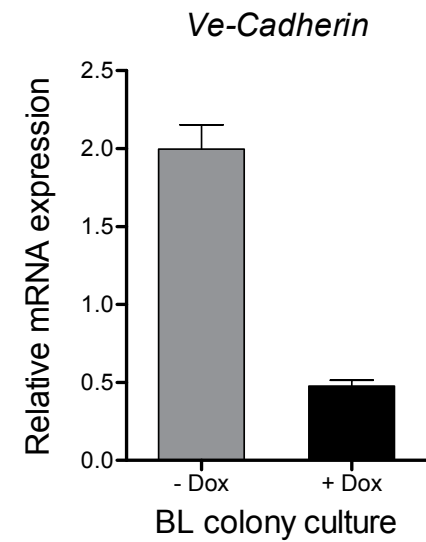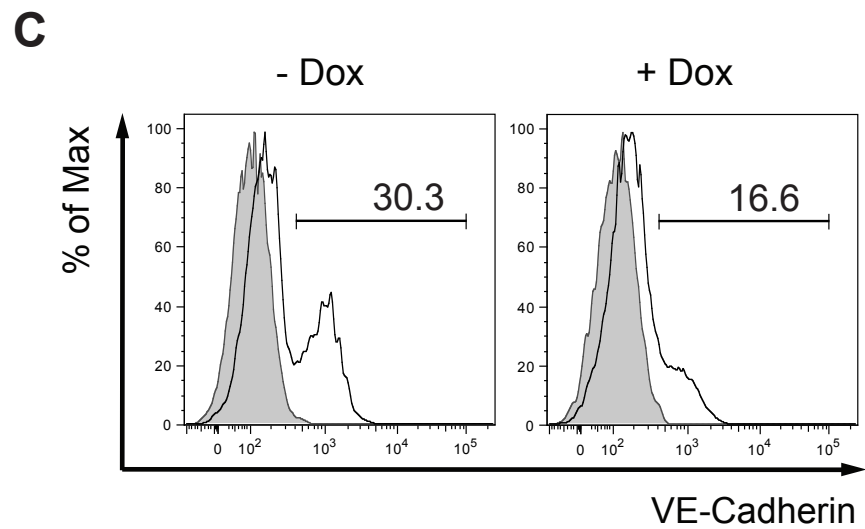

Supplement: dev071282figs7.pdf [file dev071282figs7.pdf]
